# Supplementary material
Source: PubMed Central journal article supplement (PMC3790240)
Supplement: cr2013124x4.pdf [file cr2013124x4.pdf]

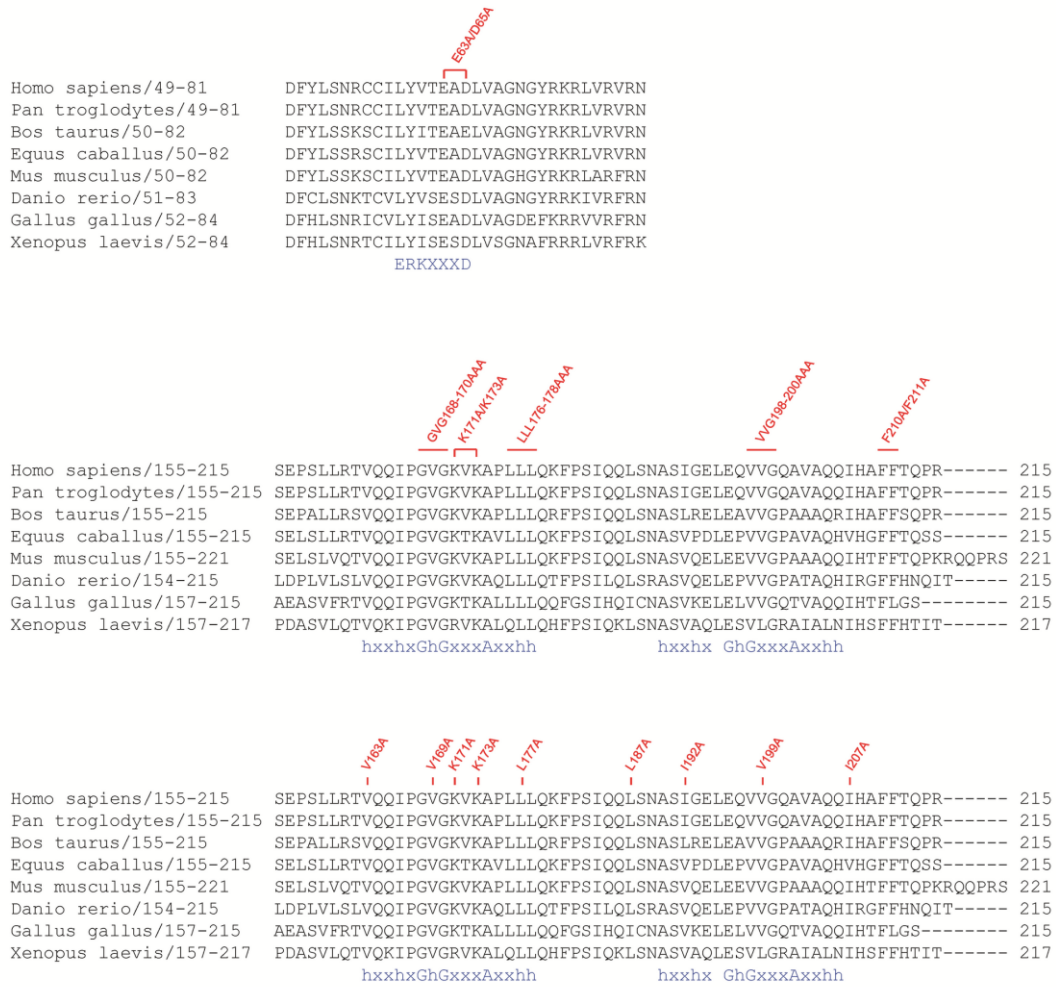

**Supplementary information, Figure S4** Alignment of the (Hh)<sub>2</sub> domain and schematics of FAAP24 mutants.
