# Supplementary material
Source: PubMed Central journal article supplement (PMC3790240)
Supplement: cr2013124x6.pdf [file cr2013124x6.pdf]

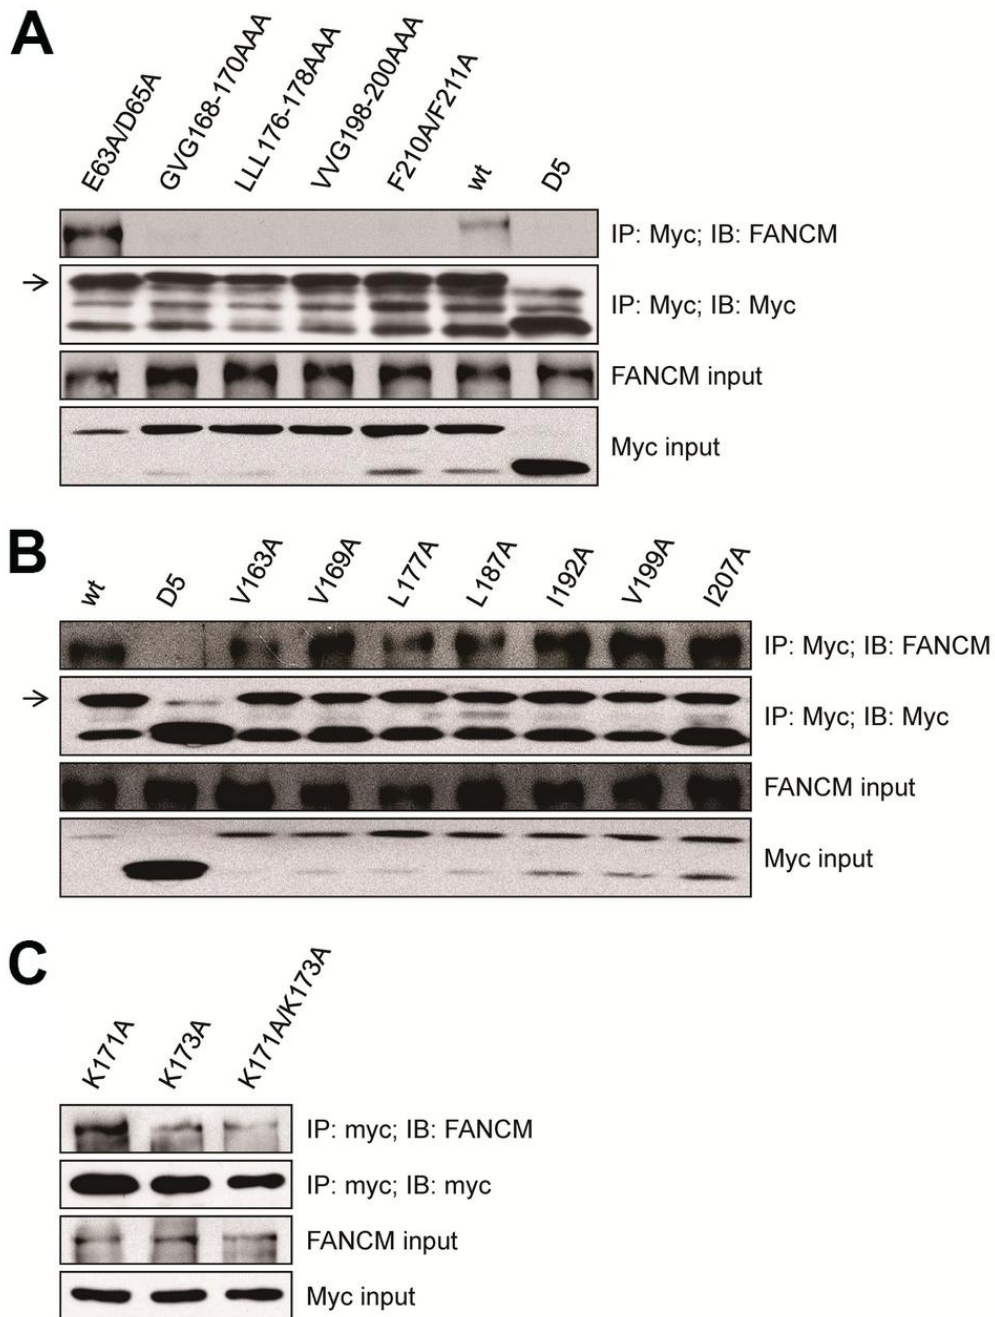

**Supplementary information, Figure S6** Co-immunoprecipitation of Myc-tagged wild type or mutant FAAP24 with FANCM. HEK293T cells were co-transfected with plasmids encoding Myc-tagged FAAP24 and FANCM, and cell lysates were subjected to immunoprecipitation with a Myc antibody.
