# Supplementary material
Source: PubMed Central journal article supplement (PMC3790240)
Supplement: cr2013124x7.pdf [file cr2013124x7.pdf]

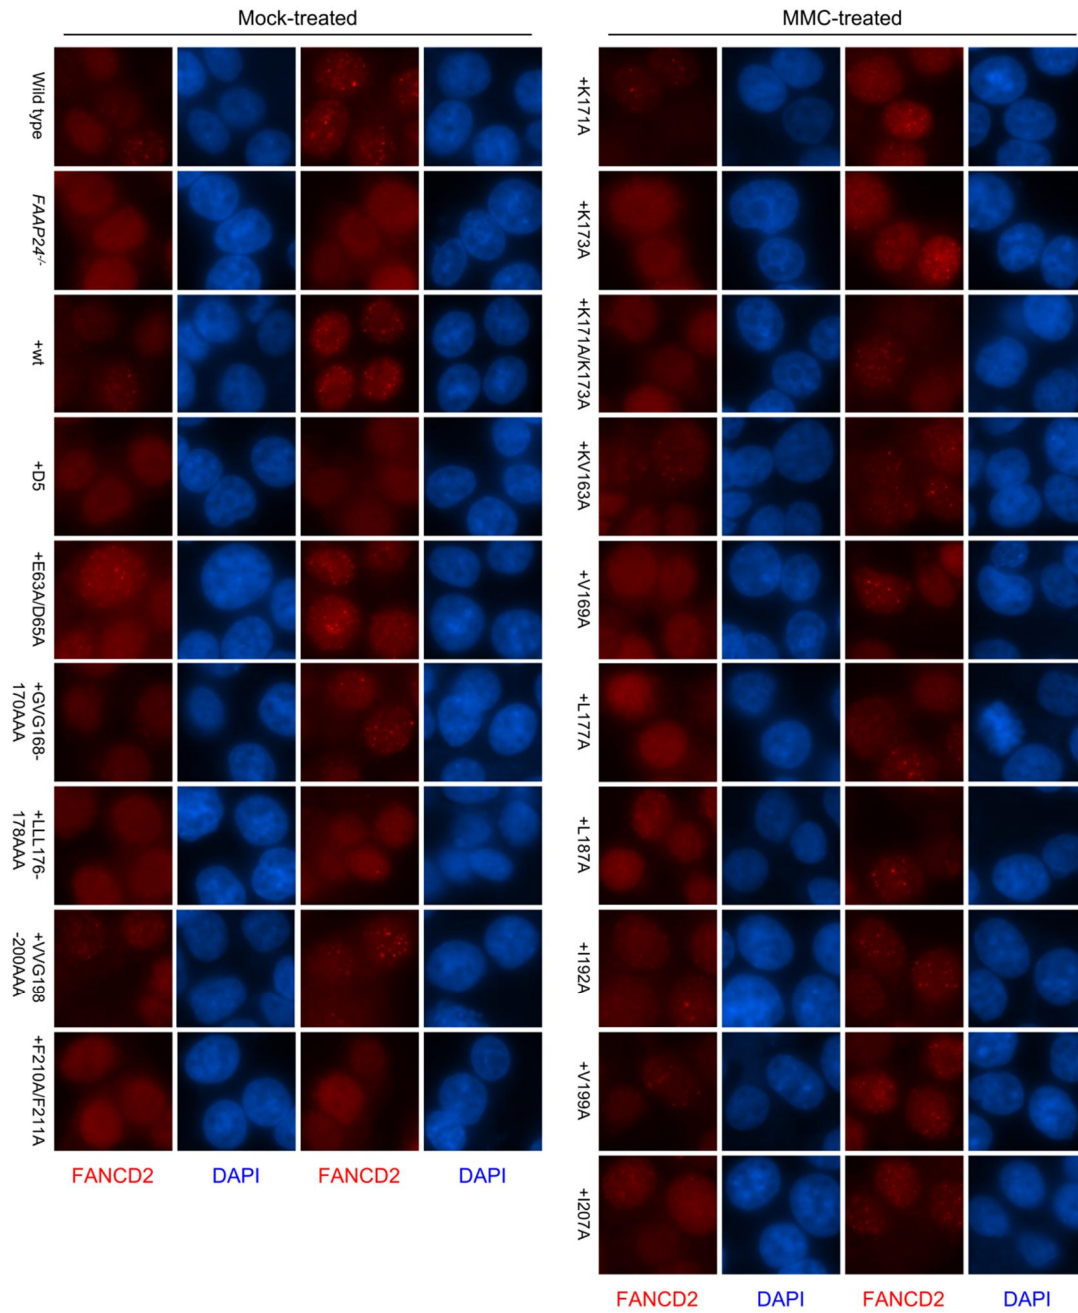

**Supplementary information, Figure S7** FANCD2 foci formation in *FAAP24*<sup>-/-</sup> cells stably complemented with wild type or mutant *FAAP24*. Cells were treated or mock-treated with 500 ng/mL MMC for 24 hrs.
