# Supplementary material
Source: PubMed Central journal article supplement (PMC3790240)
Supplement: cr2013124x8.pdf [file cr2013124x8.pdf]

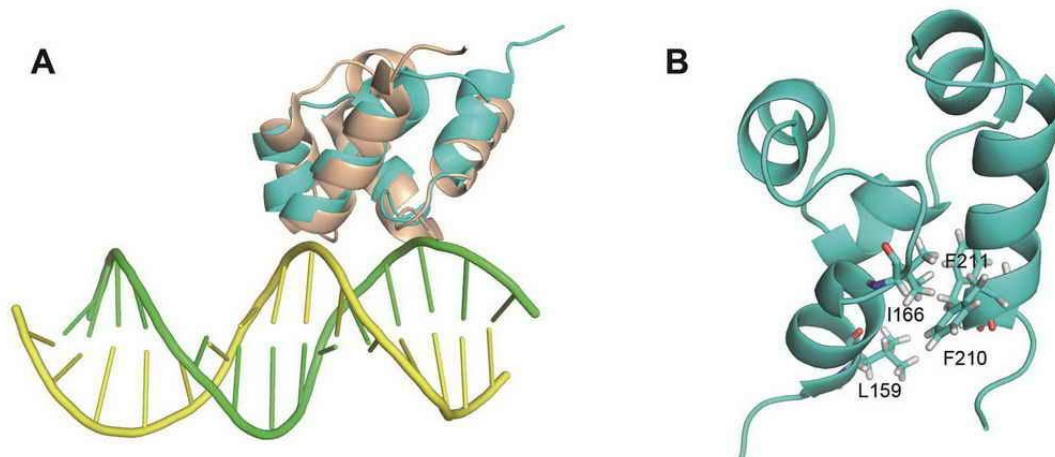

**Supplementary information, Figure S8** Additional structure view of the (HhH)<sub>2</sub> domain of FAAP24.

**(A)** Superimposition of (HhH)<sub>2</sub> domain of FAAP24 with that of ApeXPF and dsDNA. Wheat: ApeXPF; Cyan: FAAP24; Green and yellow: dsDNA. The two GhG hairpins of ApeXPF allow the protein to interact with both strands of duplex DNA, while FAAP24 can only make contact with one strand of the duplex DNA through a GVG hairpin in the first HhH motif.

**(B)** The F210, F211 (right) residues together with the L159 and I166 (left) residues form a hydrophobic core that may be important for maintaining the overall (HhH)<sub>2</sub> structure.
